# Supplementary material for: Consolidating emerging evidence surrounding HIVST and HIVSS: a rapid systematic mapping protocol
Source: Syst Rev. 2017 Apr 5;6:72. doi: 10.1186/s13643-017-0452-4 (PMC5382504; doi:10.1186/s13643-017-0452-4)
Supplement: Supplementary file 3 — Data extraction template. Template to be used to extract data and upload to map. (XLSX 9 kb) [file 13643_2017_452_MOESM3_ESM.xlsx]

## Sheet: Sheet1
ID	Author / Research Group [NB: delete Research Group or move to new cell]	Title	Country	Publication year	Approach to HIVST: Directly assisted (X)	Approach to HIVST: Unassisted (X)	Specimen: Fingerstick/whole blood (X)	Specimen: Oral-fluid (X)	Study population: KP=Key population GP=General population YP=Young people O=Other	Study population if "Other" (any text)	Study population details (any text)	Study design: - Trial - Observational - Modelling[?]	Study design details (any text)	Sample Size (any number)	Background prevalence (%)	Methodology (any text)	Summary of Findings (any text)	Source title	Source URL	Acceptability (any number or n/a)	Acceptability details (any text)	Sensitivity (%)	Specificity (%)	Concordance (%?)	Accuracy details	Willingness to pay (any number or n/a)	Willingness to pay details (any text)	Adverse events	Linkage to prevention, care and treatment		Location	City	State	Background HIV prevalence (2015 UNAIDS country data- 15-49 years of age)	Background Reported Study HIV prevalence	Reported proportion of population self-testing who are diagnosed HIV-positive	Numerator/denominator of people who are diagnosed HIV-positive	Target Population	Population	Source	Study Status	Alternative Link	Title	Type of Study	Detailed Status / Time to Results	Other Accuracy Measure	Date (Publication)	Acceptability / Willingness to Test Quote	Acceptability / Willingness to Test
[truncated: 7 more columns]
